# Supplementary material for: High-performance of deep eutectic solvent based aqueous bi-phasic systems for the extraction of DNA
Source: Royal Society of Chemistry journal article supplement (doi:10.1039/c6ra17689e), 2016-01-01
Supplement: c6ra17689e1.pdf [file c6ra17689e1.pdf]

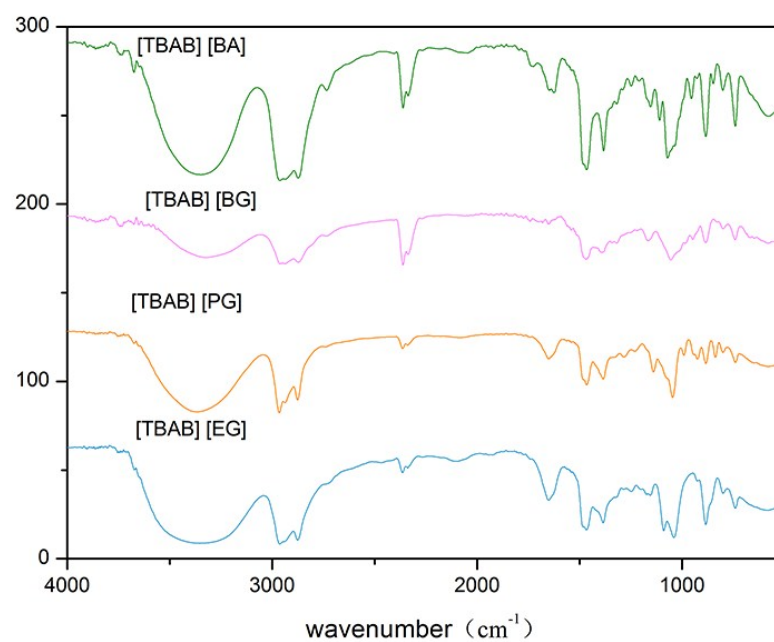

**Fig.S1** FT-IR spectra of the four deep eutectic solvents.

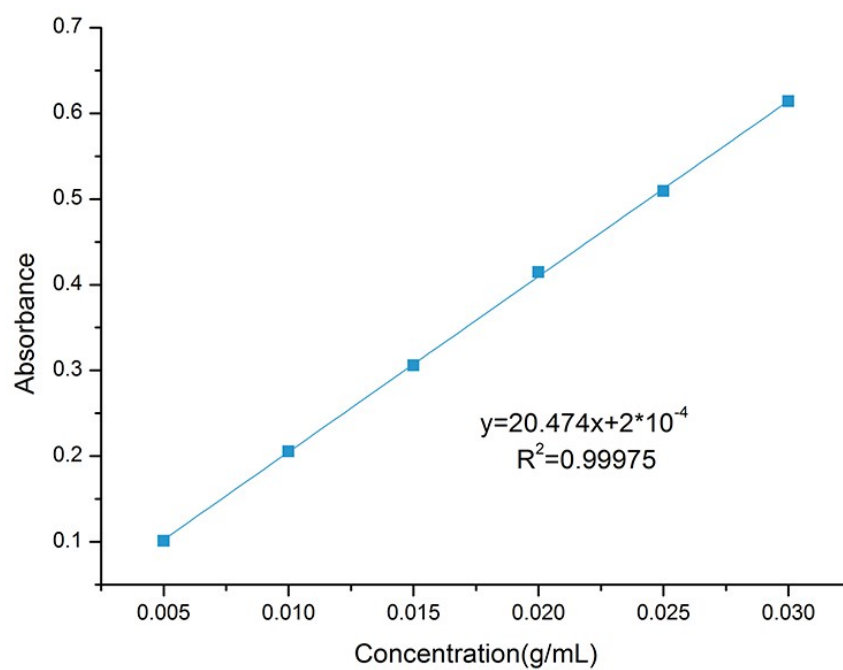

**Fig.S2** Standard curves of DNA.

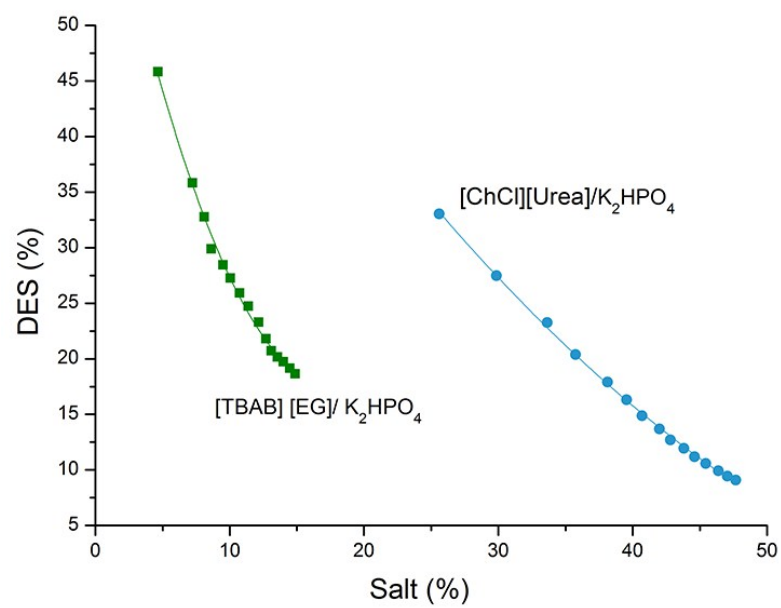

**Fig.S3** Phase diagrams of [TBAB] [EG]/K<sub>2</sub>HPO<sub>4</sub> and [ChCl] [Urea]/K<sub>2</sub>HPO<sub>4</sub>
